# Supplementary material
Source: PubMed Central journal article supplement (PMC9161177)
Supplement: NIHMS1686569-supplement-Supplementary_material.pdf [file NIHMS1686569-supplement-Supplementary_material.pdf]

## Rice intake and risk of type 2 diabetes: The Singapore Chinese Health Study

Seah JYH, Koh W-P, Yuan J-M, van Dam RM

(Supplementary Material)

Supplementary Table 1. Partial correlations between rice and noodle intake and other food and nutrient intakes<sup>1</sup>

|                                    | Rice  |         |       | Noodles |         |       |
|------------------------------------|-------|---------|-------|---------|---------|-------|
|                                    | Males | Females | All   | Males   | Females | All   |
| <b>Foods</b>                       |       |         |       |         |         |       |
| Rice                               | 1.00  | 1.00    | 1.00  | -0.30   | -0.27   | -0.29 |
| Noodles                            | -0.30 | -0.27   | -0.29 | 1.00    | 1.00    | 1.00  |
| Bread                              | -0.23 | -0.20   | -0.22 | -0.22   | -0.26   | -0.24 |
| White bread                        | -     | -       | -     | -0.18   | -0.20   | -0.19 |
| Wholemeal bread                    | -     | -       | -     | -       | -       | -     |
| Red meat                           | -0.29 | -0.22   | -0.24 | 0.24    | 0.25    | 0.24  |
| Poultry                            | -0.23 | -0.19   | -0.21 | -       | -       | -     |
| Fish                               | -0.30 | -0.28   | -0.30 | 0.23    | 0.24    | 0.24  |
| Soy                                | -0.33 | -0.35   | -0.36 | -       | -       | -     |
| Vegetables                         | -0.33 | -0.37   | -0.37 | -       | -       | -     |
| Fruits                             | -0.30 | -0.35   | -0.34 | -       | -       | -     |
| <b>Nutrients / Food components</b> |       |         |       |         |         |       |

|                          |       |       |       |       |       |       |
|--------------------------|-------|-------|-------|-------|-------|-------|
| Carbohydrate             | 0.75  | 0.70  | 0.73  | -0.31 | -0.32 | -0.32 |
| Starch                   | 0.94  | 0.93  | 0.93  | -0.19 | -0.17 | -0.18 |
| Dietary fibre            | -0.45 | -0.50 | -0.50 | -     | -     | -     |
| Protein                  | -0.51 | -0.53 | -0.54 | 0.31  | 0.30  | 0.31  |
| Total fat                | -0.75 | -0.79 | -0.78 | 0.29  | 0.27  | 0.28  |
| Saturated fat            | -0.62 | -0.61 | -0.63 | 0.28  | 0.25  | 0.27  |
| Monounsaturated fat      | -0.69 | -0.70 | -0.71 | 0.28  | 0.26  | 0.28  |
| Polyunsaturated fat      | -0.49 | -0.47 | -0.50 | -     | -     | -     |
| Marine n-3 fatty acids   | -0.31 | -0.29 | -0.31 | 0.25  | 0.28  | 0.27  |
| $\alpha$ -linolenic acid | -0.38 | -0.37 | -0.39 | -     | -     | -     |
| Calcium                  | -0.48 | -0.43 | -0.47 | -     | -     | -     |
| Magnesium                | -0.46 | -0.48 | -0.49 | -     | -     | -     |
| Iron                     | -0.67 | -0.71 | -0.70 | 0.41  | 0.39  | 0.40  |
| PS Ratio <sup>2</sup>    | -     | -     | -     | -     | -     | -     |
| AHEI <sup>3</sup>        | -0.16 | -0.21 | -0.20 | -     | -     | -     |

---

<sup>1</sup> Only correlations with an absolute  $r \geq 0.15$  are shown for the purpose of simplicity. All displayed correlations were significant at  $P \leq 0.05$ . Partial correlations were adjusted for total energy intake.

<sup>2</sup> Ratio of polyunsaturated fatty acid intake : saturated fat intake.

<sup>3</sup> Alternative Healthy Eating Index score - 2010 (31).

Supplementary Table 2. Baseline characteristics according to quintiles of noodles intake in men and women<sup>1</sup>

|                                               | Men              |                |                   | Women            |                |                   |
|-----------------------------------------------|------------------|----------------|-------------------|------------------|----------------|-------------------|
|                                               | Quintile 1 (low) | Quintile 3     | Quintile 5 (high) | Quintile 1 (low) | Quintile 3     | Quintile 5 (high) |
| n                                             | 4922             | 3389           | 3972              | 4161             | 5693           | 5110              |
| Median noodles intake (g/d)                   | 10.5             | 46.8           | 108.2             | 14.8             | 46.6           | 106.9             |
| Age at interview (y)                          | 55.8 ± 7.7       | 55.6 ± 7.6     | 54.4 ± 7.3        | 55.7 ± 7.6       | 55.1 ± 7.7     | 54.1 ± 7.3        |
| Cantonese [n (%)]                             | 2348 (47.7)      | 1530 (45.2)    | 1952 (49.2)       | 2101 (50.5)      | 2653 (46.6)    | 2650 (51.9)       |
| Higher education level [n (%)] <sup>2</sup>   | 2088 (42.4)      | 1355 (40.0)    | 1558 (39.2)       | 1099 (26.4)      | 1283 (22.5)    | 1109 (21.7)       |
| Current smokers [n (%)]                       | 1632 (33.2)      | 1227 (36.2)    | 1488 (37.5)       | 220 (5.3)        | 332 (5.8)      | 304 (6.0)         |
| Alcohol consumption [n (%)] <sup>3</sup>      | 1102 (22.4)      | 737 (21.8)     | 922 (23.2)        | 249 (6.0)        | 266 (4.7)      | 247 (4.8)         |
| Higher physical activity [n (%)] <sup>4</sup> | 2458 (49.9)      | 1500 (44.3)    | 1714 (43.2)       | 1209 (29.1)      | 1456 (25.6)    | 1211 (23.7)       |
| Body mass index (kg/m <sup>2</sup> )          | 22.8 ± 3.1       | 22.8 ± 3.1     | 23.2 ± 3.3        | 22.7 ± 3.1       | 23.1 ± 3.2     | 23.5 ± 3.4        |
| History of hypertension [n (%)]               | 902 (18.3)       | 633 (18.7)     | 786 (19.8)        | 703 (16.9)       | 1119 (19.7)    | 1089 (21.3)       |
| Energy intake (kcal)                          | 1967.6 ± 507.3   | 1604.7 ± 530.2 | 1903.0 ± 579.7    | 1646.4 ± 406.5   | 1288.5 ± 398.6 | 1500.6 ± 451.0    |
| Food intake (g/d)                             |                  |                |                   |                  |                |                   |
| Rice                                          | 525.2 ± 198.3    | 445.4 ± 147.2  | 381.1 ± 165.4     | 432.6 ± 176.8    | 398.3 ± 117.0  | 330.8 ± 123.9     |
| Bread                                         | 38.9 ± 29.5      | 32.7 ± 23.5    | 23.2 ± 23.5       | 42.1 ± 25.7      | 34.3 ± 20.3    | 24.7 ± 19.4       |
| White bread                                   | 37.4 ± 35.4      | 32.8 ± 34.7    | 21.2 ± 25.3       | 44.5 ± 38.6      | 37.9 ± 37.5    | 23.8 ± 26.8       |
| Wholemeal bread                               | 9.1 ± 22.8       | 7.4 ± 21.0     | 4.5 ± 14.6        | 12.0 ± 25.8      | 9.6 ± 23.9     | 5.2 ± 15.5        |
| Red meat                                      | 23.7 ± 23.3      | 31.1 ± 17.3    | 37.8 ± 21.6       | 22.9 ± 18.9      | 30.0 ± 13.7    | 35.5 ± 15.9       |

|            |               |               |               |               |               |               |
|------------|---------------|---------------|---------------|---------------|---------------|---------------|
| Poultry    | 16.4 ± 19.6   | 21.3 ± 15.4   | 22.2 ± 19.3   | 16.9 ± 17.1   | 21.6 ± 12.5   | 23.4 ± 15.8   |
| Fish       | 45.5 ± 31.1   | 52.7 ± 25.1   | 62.8 ± 29.3   | 49.3 ± 28.4   | 55.0 ± 22.0   | 66.6 ± 25.8   |
| Soy        | 87.3 ± 95.4   | 102.3 ± 71.8  | 105.7 ± 90.1  | 112.4 ± 94.7  | 121.5 ± 70.0  | 131.3 ± 82.1  |
| Vegetables | 96.1 ± 65.5   | 100.4 ± 48.1  | 105.4 ± 55.6  | 123.2 ± 69.1  | 117.6 ± 46.8  | 125.2 ± 50.2  |
| Fruits     | 201.3 ± 191.7 | 192.6 ± 141.8 | 165.3 ± 149.2 | 247.4 ± 194.9 | 215.0 ± 129.4 | 193.6 ± 133.4 |

---

<sup>1</sup> Mean ± SD (all such values).

<sup>2</sup> Secondary school and above.

<sup>3</sup> At least once weekly.

<sup>4</sup> At least 0.5 hours per week of moderate or strenuous physical activity.
